**Title:** Redox potential as a master variable controlling pathways of metal reduction by *Geobacter sulfurreducens*

**Running Title:** Fe(III) reduction by *G. sulfurreducens*

**Authors:** Caleb E. Levar<sup>1</sup>, Colleen L. Hoffman<sup>2</sup>, Aubrey J. Dunshee<sup>2</sup>, Brandy M. Toner<sup>2, 3</sup>, Daniel R. Bond<sup>1</sup>

**Author Affiliations:** 1) BioTechnology Institute, Department of Microbiology, University of Minnesota - Twin Cities, St. Paul, MN 55108, USA

2) Department of Earth Sciences, University of Minnesota – Twin Cities, Minneapolis, MN, 55455, USA

3) Department of Soil, Water, and Climate, University of Minnesota – Twin Cities, St. Paul, MN 55108, USA

**Corresponding Author:**

Daniel R. Bond  
140 Gortner Laboratory  
1479 Gortner Ave  
St. Paul, MN 55108  
dbond@umn.edu

**Conflict of Interest Statement:** The authors declare no conflict of interest.

**Keywords:** Metal reduction, Extracellular electron transfer, Iron oxide, *Geobacter*

## Abstract:

*Geobacter sulfurreducens* uses at least two different pathways to transport electrons out of the inner membrane quinone pool before reducing acceptors beyond the outer membrane. When growing on electrodes poised at oxidizing potentials, the CbcL-dependent pathway operates at or below redox potentials of -0.10 V vs. the Standard Hydrogen Electrode (SHE), while the ImcH-dependent pathway operates only above this value. Here, we provide evidence that *G. sulfurreducens* also requires different electron transfer proteins for reduction of a wide range of Fe(III)- and Mn(IV)- (oxyhydr)oxides, and must transition from a high- to low-potential pathway during reduction of commonly studied minerals. Freshly precipitated Fe(III)-(oxyhydr)oxides could not be reduced by mutants lacking the high potential pathway. Aging these minerals by autoclaving did not change their powder X-ray diffraction pattern, but restored reduction by mutants lacking the high-potential pathway. Mutants lacking the low-potential, CbcL-dependent pathway had higher growth yields with Fe(III). Together, these data suggest that the ImcH-dependent pathway exists to harvest additional energy when conditions permit, and CbcL allows respiration closer to thermodynamic equilibrium conditions. With evidence of multiple pathways within a single organism, the study of extracellular respiration should consider not only the crystal structure or solubility of a mineral electron acceptor, but rather the redox potential, as this variable determines the energetic reward affecting reduction rates, extents, and final microbial growth yields in the environment.

## Introduction:

Fe(III)-(oxyhydr)oxides can exist in at least 15 mineral forms that have variable physiochemical properties and span a wide range of formal oxidation-reduction (redox) midpoint potentials (Majzlan, Navrotsky, & Schwertmann, 2004; Majzlan, 2011, 2012; Nealson & Saffarini, 1994; Schwertmann & Cornell, 2000; Thamdrup, 2000). The electron-accepting potential of any given Fe(III)-(oxyhydr)oxide structure is not a fixed value, and becomes less favorable with increasing crystallinity, particle size, pH, or ambient Fe(II) concentration (Majzlan, 2012; Navrotsky, Mazeina, & Majzlan, 2008; Sander, Hofstetter, & Gorski, 2015; Thamdrup, 2000). Differences in effective redox potential alter the energy available to be captured by bacteria able to couple the oxidation of an electron donor to reduction of these minerals (Thauer, Jungermann, Decker, & Pi, 1977). Because of this structural and environmental diversity, organisms able to reduce metals could sense the energy available in their electron acceptors and utilize different electron transfer pathways, similar to how *E. coli* uses distinct terminal oxidases in response to levels of available oxygen (Green & Paget, 2004; Russell & Cook, 1995).

One well-studied dissimilatory metal reducing organism, *Geobacter sulfurreducens*, can grow via reduction of metal (oxyhydr)oxides ranging in predicted midpoint redox potential from +0.35 V vs. the Standard Hydrogen Electrode (SHE) (e.g., birnessite, ca.  $\text{Na}_x\text{Mn}_{2-x}(\text{IV})\text{Mn}(\text{III})_x\text{O}_4$ ,  $x \sim 0.4$ ) to -0.17 V vs. SHE (e.g., goethite,  $\alpha\text{-FeOOH}$ ) (Caccavo et al., 1994; Majzlan et al., 2004; Majzlan, 2012; Post & Veblen, 1990; Thamdrup, 2000). Recent work examining electron transfer from *G. sulfurreducens* to poised graphite electrodes demonstrated that this organism uses at least two different inner membrane electron transfer pathways, known as the CbcL- and ImcH-dependent pathways (Levar, et al., 2014; Zacharoff, et al., 2016). The 'low' potential, CbcL-dependent pathway, is required for growth with electrodes at or below potentials of -0.10 V vs. SHE, while the 'high' potential, ImcH-dependent pathway, is essential when electrodes are poised at redox potentials above this value. As mutants lacking each pathway only

grow with electrodes poised above or below these thresholds, cells containing only CbcL or ImcH could be used as 'sensors' to report the redox potential of an extracellular electron acceptor.

The discovery of multiple inner membrane pathways is based on work with electrodes held at constant potentials, but poses many questions regarding *G. sulfurreducens*' interactions with more complex mineral substrates. Does the organism transition from one pathway to the other as simple environmental factors such as Fe(II):Fe(III) ratios alter redox potentials? Do manipulations known to alter redox potential, such as pH or particle size, also influence the pathway utilized? As this +/- 0.5 V redox potential range represents nearly 50 kJ per mol of electrons transferred, do different electron transfer mechanisms allow higher yield of this microbe?

Here, we demonstrate that *G. sulfurreducens* requires both the CbcL- and the ImcH-dependent electron transfer pathways for complete reduction of a variety of Fe and Mn minerals. By using mutants only able to function at specific redox potentials, we show that minerals often used for study of extracellular electron transfer begin as 'high' potential electron acceptors reducible by the ImcH-dependent pathway, but transition during reduction to 'low' potential electron acceptors requiring the CbcL-dependent pathway. Simple variations in mineral handling such as autoclaving, or 0.5 unit pH changes that alter redox potential by 30 mV, can alter the electron transfer pathway required by the organism, further showing that bacteria detect subtle changes in mineral redox potentials. These data highlight the complexity of studying growth with minerals, and suggests that the proteins used for electron flow out of *G. sulfurreducens* are more strongly influenced by redox potential than the crystal structure, aggregation behavior, or even solubility of the terminal acceptor.

# **Materials and methods:**

**Bacterial strains and culture conditions:** Strains of *Geobacter sulfurreducens* used in this study are described in Table 1. All strains were routinely cultured from freezer stocks stored at -80 degrees Celsius, and single colony picks from agar plates were used to initiate all experiments. Strains were cultured in NB minimal medium composed of 0.38 g/L KCl, 0.2 g/L NH<sub>4</sub>Cl, 0.069 g/L NaH<sub>2</sub>PO<sub>4</sub>·H<sub>2</sub>O, 0.04 g/L CaCl<sub>2</sub>·2H<sub>2</sub>O, and 0.2 g/L MgSO<sub>4</sub>·7H<sub>2</sub>O. 10 ml/L of a chelated mineral mix containing 1.5g/L NTA, 0.1 g/L MnCl<sub>2</sub>·4H<sub>2</sub>O, 0.3 g/L FeSO<sub>4</sub>·7H<sub>2</sub>O, 0.17 g/L CoCl<sub>2</sub>·6H<sub>2</sub>O, 0.1 g/L ZnCl<sub>2</sub>, 0.04 g/L CuSO<sub>4</sub>·5H<sub>2</sub>O, 0.005 g/L AlK(SO<sub>4</sub>)<sub>2</sub>·12H<sub>2</sub>O, 0.005g/L H<sub>3</sub>BO<sub>3</sub>, 0.09 g/L Na<sub>2</sub>MoO<sub>4</sub>, 0.12 g/L NiCl<sub>2</sub>, 0.02 g/L NaWO<sub>4</sub>·2H<sub>2</sub>O, and 0.1 g/L Na<sub>2</sub>SeO<sub>4</sub> was also added. Fumarate (40 mM) was used as an electron acceptor for growth of initial stocks picked from colonies, and acetate (20mM) was used as the sole electron and carbon source. Unless otherwise noted, the pH of the medium was adjusted to 6.8 and buffered with 2 g/L NaHCO<sub>3</sub>, purged with N<sub>2</sub>:CO<sub>2</sub> gas (80%/20%) passed over a heated copper column to remove trace oxygen, and autoclaved for 20 minutes at 121 degrees Celsius.

## **Here Table 1**

**X-ray diffraction (XRD) measurements:** Approximately 0.2-0.5 g of untreated bulk mineral sample or 2.5 ml of mineral suspension in medium were analyzed by powder XRD. Minerals in basal media were separated from suspension by filtration (0.22 µm) in an anaerobic chamber (Coy Laboratory Products) under a N<sub>2</sub>:CO<sub>2</sub>:H<sub>2</sub> (75%:20%:5%) atmosphere, and stored in sealed mylar bags at -20 degrees Celsius prior to analysis. Diffractograms were measured from using 20° to 89° (2θ) range, a step size of 0.02 2θ, and a dwell of 0.5°/minute using a Rigaku MiniFlex ASC-6AM with a Co source. The resulting diffractograms were background subtracted, and phases were identified using Jade v9.1 software (MDI, Inc.).

**Preparation of Fe(III)-(oxyhydr)oxides:** “Poorly crystalline FeO(OH)” was produced after Lovley

and Phillips, 1986, by adding 25% NaOH dropwise over 90 minutes to a rapidly stirring 0.4 M solution of FeCl<sub>3</sub> until the pH was 7.0. The solution was held at pH 7.0 for one hour, and the resulting suspension was washed with one volume of de-ionized and distilled water and used immediately ( $\leq 24$  after synthesis) for XRD analysis and growth studies as rapid aging of such products to more crystalline minerals (e.g., goethite) has been observed even when kept in the dark at 4 degrees Celsius (Raven, Jain, & Loeppert, 1998). The untreated mineral was identified as akaganeite ( $\beta$ -FeOOH) by powder X-ray diffraction. Washing the mineral sample with up to three volumes of de-ionized and distilled water did not change the XRD pattern of the mineral or the reduction phenotypes observed.

Goethite and 2-line ferrihydrite (ca. Fe<sub>10</sub>O<sub>14</sub>(OH)<sub>2</sub>) (Michel et al., 2007) were synthesized after Schwertmann and Cornell, 2000, with some modifications. For goethite, a solution of FeCl<sub>3</sub> was precipitated through neutralization with 5 N KOH, and the resulting alkaline mineral suspension was aged at 70 degrees Celsius for 60 hours to facilitate goethite formation. The suspension was then centrifuged, decanted, and washed with de-ionized and distilled water prior to freeze drying. For 2-line ferrihydrite, a solution of FeCl<sub>3</sub> was neutralized with KOH until the pH was 7.0. Suspensions were rinsed with de-ionized and distilled water and either freeze dried or centrifuged and suspended in a small volume of de-ionized and distilled water to concentrate the final product. Freeze dried samples yielded XRD patterns indicative of 2-line ferrihydrite, but suspension of hydrated samples in growth medium had an altered XRD pattern more similar to that of akaganeite. Freeze dried samples were stored at -80 degrees Celsius prior to addition to growth medium, while hydrated samples were used within 24 hours of synthesis.

Schwertmannite (Fe<sub>8</sub>O<sub>8</sub>(OH)<sub>6</sub>(SO<sub>4</sub>)·nH<sub>2</sub>O) was synthesized using a rapid precipitation method involving the addition of a 30% solution of H<sub>2</sub>O<sub>2</sub> to a solution of FeSO<sub>4</sub> (Regenspurg, Brand, & Peiffer,

2004). The mixture was stirred rapidly for at least 12 hours until the pH was stable, at ~2.35. The solids were allowed to settle for 1 hour, and the supernatant carefully decanted. Solids were washed by centrifuging at 3,700 x g and suspending in 1 volume of de-ionized and distilled water. The product was concentrated by a final centrifugation at 3,700 x g for 5 minutes and resuspension in 1/20 the initial volume. XRD identified this initial product as schwertmannite, though subsequent addition to media at neutral pH values and autoclaving rapidly altered the mineral form.

**Iron reduction assays:** Basal media were prepared as above with some modifications. Fumarate was omitted as the Fe(III)-(oxyhydr)oxides were desired as the sole electron acceptor. NTA free trace mineral mix (in which all components were first dissolved in a small volume of HCl) was used in order to eliminate exogenous chelating compounds from the media. All media were purged with N<sub>2</sub>:CO<sub>2</sub> gas (80%:20%) passed over a heated copper column to remove trace oxygen. Where indicated, media were autoclaved for 20 minutes at 121 degrees Celsius on a gravity cycle, and were immediately removed to cool at room temperature in the dark. As is standard for *G. sulfurreducens* medium containing Fe(III)-(oxyhydr)oxide (Caccavo et al., 1994), additional NaH<sub>2</sub>PO<sub>4</sub>·H<sub>2</sub>O (to a final concentration of 0.69 g/L) was added prior to autoclaving, as more recalcitrant and less reducible forms of Fe(III)-(oxyhydr)oxide will form when autoclaved without additional phosphate. For freshly precipitated akaganeite and 2-line ferrihydrite, 1 ml of the Fe-(oxyhydr)oxide suspension was added to 9 ml of basal medium. The final pH was adjusted by altering the pH of the basal medium prior to mineral addition and by altering the concentration of NaHCO<sub>3</sub> used prior to purging with anaerobic N<sub>2</sub>:CO<sub>2</sub> gas (80%/20%). For goethite, an 88 g/L suspension was made in de-ionized and distilled water and 1 ml of this suspension was added to 9 ml of basal medium. The resulting medium had an effective Fe<sub>total</sub> concentration of ~20 mM as determined by fully reducing an acidified sample with hydroxylamine and measuring the resulting Fe(II) using a modified Ferrozine assay (Lovley & Phillips, 1987). Because the synthesis of schwertmannite results in an acidic product below the pH at which *G. sulfurreducens* grows optimally (Caccavo et al.,

1994; Regenspurg et al., 2004), the mineral suspension was added to the basal medium (1:9) and the pH of the solution was adjusted with NaOH and bicarbonate to produce a final pH of 6.8. For freeze dried 2-line ferrihydrite, 0.2 grams of freeze dried sample was added per 10 ml of basal medium.

In all cases, 100  $\mu$ l of electron acceptor-limited stationary phase cells ( $OD_{600} = 0.55$ ) grown from single colony picks in NB basal medium containing acetate (20 mM) and fumarate (40 mM) were used to inoculate the Fe(III)-(oxyhydr)oxide containing media, with acetate provided as the electron and carbon donor and the Fe(III)-(oxyhydr)oxide as the sole electron acceptor.

For all Fe(III)-(oxyhydr)oxide incubations except those involving goethite, a small sample was removed at regular intervals and dissolved in 0.5 N HCl for at least 24 hours at 23-25 degrees Celsius in the dark before the acid extractable Fe(II) present in the sample was measured. For incubations with goethite, samples were incubated in 1 N HCl at 65 degrees Celsius for at least 24 hours in the dark, followed by centrifugation at 13,000 x g for 10 minutes to remove solids. Fe(II) in the supernatant was then measured.

**Manganese reduction assays:** Birnessite ( $Na_xMn_{2-x}(IV)Mn(III)_xO_4$ ,  $x \sim 0.4$ ) was prepared using the protocol described in Chan, et al, 2015. Briefly, a solution of  $KMnO_4$  was added to an equal volume of  $MnCl_2 \cdot 4H_2O$  solution and mixed vigorously. Solids were allowed to settle, and the overlaying liquid was decanted off. The resulting solid was washed in de-ionized and distilled water and concentrated by centrifugation. This suspension was added ( $\sim 20$  mM) to basal medium containing acetate (10 mM) as the carbon and electron donor. Cells were inoculated to a calculated  $OD_{600}$  of 0.005 from electron acceptor-limited stationary phase cells. Mn(II) was measured indirectly as previously described (Chan et al., 2015; Levar et al., 2014). Briefly, samples were acidified in 2 N HCl with 4 mM  $FeSO_4$  added and allowed to dissolve overnight at 25 degrees Celsius in the dark. After all solids were dissolved, the Fe(II)



concentration was measured. Because the reduction of Mn(IV) by Fe(II) is thermodynamically favorable, the measured Fe(II) concentration can be used to extrapolate the Mn(II) present a given sample.

## Results:

The inner membrane multiheme cytochromes ImcH and CbcL are implicated in transfer of electrons out of the quinone pool when electron acceptors fall within different redox potential windows (Levar et al., 2014; Zacharoff et al., 2016). Mutants lacking *imcH* are only able to reduce poised electrodes with 'low' redox potentials ( $\leq -0.10$  V vs. SHE), and are deficient in reduction of electrodes at redox potentials above this value (Levar et al., 2014). In contrast, *cbcl* mutants have the opposite phenotype, reducing electrodes with relatively high redox potentials, and having a deficiency in reduction of acceptors at or below  $-0.10$  V vs. SHE (Zacharoff et al., 2016). These pathways are constitutive (Zacharoff et al., 2016), and use of each pathway appears to be able to switch in a matter of minutes during sweeps of increasing or decreasing potential known as catalytic cyclic voltammetry (Marsili, Rollefson, Baron, Hozalski, & Bond, 2008; Yoho, Papat, & Torres, 2014; Zacharoff et al., 2016).

A simple experiment testing if these two pathways could also be essential for reduction of 'low' and 'high' potential metal oxide acceptors is shown in Figure 1. When wild type *G. sulfurreducens* was compared to markerless deletion mutants lacking each pathway, mutants lacking ImcH could not reduce laboratory synthesized birnessite (a  $\sim +0.35$  V acceptor), while CbcL mutants could not reduce goethite (a  $\sim -0.17$  V acceptor) (Majzlan, 2012; Nealson & Myers, 1992; Orsetti, Laskov, & Haderlein, 2013; Thamdrup, 2000; Thauer et al., 1977) (Figure 1). These observations were consistent with redox potential preferences first described with electrodes poised at  $+0.24$  or  $-0.10$  V vs. SHE, and show the utility of using these strains to report the effective redox potentials of minerals (Chan et al., 2015; Levar et al., 2014; Zacharoff et al., 2016).

**Here Figure 1**

**Evidence that the electron transfer pathway changes even in the absence of XRD-pattern changes**

Most Fe(III)-(oxyhydr)oxides do not exist at these high or low extremes, but possess electron accepting potentials predicted to lie near the -0.10 V redox potential threshold that requires a transition from ImcH-dependent to the CbcL-dependent reduction pathways in electrode-grown cells (Levar et al., 2014; Majzlan et al., 2004; Majzlan, 2012; Thamdrup, 2000; Zacharoff et al., 2016). While testing this with electrodes is straightforward, the redox potential of Fe(III)-(oxyhydr)oxides in this range is not easy to predict or measure (Sander et al., 2015). Aging (accelerated by autoclaving or freeze drying) can increase particle size and lower redox potential, or drive re-crystallization to lower redox potential forms (Navrotsky et al., 2008; Roden, Urrutia, & Mann, 2000; Roden & Zachara, 1996; Roden, 2006; Thamdrup, 2000). As Fe(III)-(oxyhydr)oxide reduction is a proton consuming reaction (Kostka & Nealson, 1995; Majzlan, 2012; Thamdrup, 2000), for each unit decrease in pH, the redox potential of the Fe(III)/Fe(II) redox couple increases by ~59 mV per the Nernst equation (Bonneville, Van Cappellen, & Behrends, 2004; Kostka & Nealson, 1995; Majzlan, 2012; Thamdrup, 2000).

To test the hypothesis that *G. sulfurreducens* also utilizes ImcH- or CbcL-dependent pathways to reduce minerals on the basis of redox potential, we prepared Fe(III)-(oxyhydr)oxides by slow precipitation of FeCl<sub>3</sub> with NaOH (Lovley & Phillips, 1986), and characterized minerals before and after addition to medium using XRD. While Fe(III)-(oxyhydr)oxides prepared in this manner are often referred to as “poorly crystalline” or “amorphous”, all XRD signatures of our preparations were consistent with akaganite (β-FeOOH) (Figure 2E). Because the β-FeOOH/Fe(II) redox couple has a midpoint potential near -0.10 V vs. SHE (Majzlan, 2012), a fresh, fully oxidized suspension of fresh akaganite would initially have a redox potential above 0 V vs SHE, and theoretically require only the ‘high’ potential pathway of *G. sulfurreducens*.

When wild-type, *ΔimcH*, and *Δcbcl* strains were incubated with freshly precipitated akaganeite, wild-type cultures rapidly reduced the provided Fe(III)-(oxyhydr)oxide. The *Δcbcl* cultures containing the high-potential pathway initially reduced fresh akaganeite at rates similar to wild type, but reduction slowed as Fe(II) accumulated, and the concentration of Fe(II) never reached the extent of wild type. In contrast, *ΔimcH* cultures lacking the high potential pathway demonstrated a substantial lag, remaining near background for 7 days (Figure 2A). Once metal reduction began, *ΔimcH* cultures were able to reach the final extent observed in wild type. No reduction was observed in cell-free controls.

When medium containing akaganeite was autoclaved to lower redox potential due to accelerated aging, both wild type and *Δcbcl* performed similarly, but the lag observed with *ΔimcH* was much shorter (Figure 2B). Despite the substantial change in the *ΔimcH* Fe(III)-(oxyhydr)oxide reduction phenotype, the XRD pattern before and after autoclaving was similar (Figure 2E). Such a lack of XRD alteration in response to autoclaving has been previously noted (Hansel et al., 2015). This suggests that phenotypic changes were due to mineral alteration outcomes not detected by powder XRD, such as short-range structural order or particle aggregation, that lowered effective redox potential and allowed growth of the *ΔimcH* strain lacking the high-potential pathway.

# **Reduction phenotypes also respond to changes in medium pH that alter redox potential**

The lag in extracellular electron transfer by *ΔimcH*, in contrast to immediate reduction by *Δcbcl*, suggests that fresh akaganeite has an initial redox potential greater than -0.10 V vs. SHE. Based on this hypothesis, only after a small amount of Fe(II) accumulates does potential drop into a range reducible by *ΔimcH*. Similarly, aging fresh akaganite by autoclaving shortened the lag in Figure 2B likely by lowering redox potential. If this is true, then manipulations designed to raise redox potential should extend this lag or prevent *ΔimcH* from reducing akaganeite altogether.

Because Fe(III)-(oxyhydr)oxide reduction is a proton consuming reaction, decreasing pH will increase the redox potential, an effect that has been used to explain magnetite reduction by *Shewanella oneidensis* (Kostka & Nealson, 1995; Majzlan, 2012; Thamdrup, 2000). When the pH of basal medium containing akaganeite was adjusted to 6.3 (raising the redox potential ~30 mV), near complete inhibition of reduction by  $\Delta imcH$  was observed (Figure 2C). Autoclaving pH 6.3 akaganeite medium was not sufficient to restore the reduction phenotype of  $\Delta imcH$ , but did aid reduction by  $\Delta cbcl$  (Figure 2D). As with medium at pH 6.8, autoclaving at 6.3 did not substantially alter the XRD pattern of the mineral provided (Figure 2E). Importantly, wild type,  $\Delta imcH$ , and  $\Delta cbcl$  grew without significant defects at pH values of 6.3 or 6.8 in control experiments containing fumarate as the sole terminal electron acceptor (Table 1). Based on these results, when akaganeite is autoclaved at pH 6.8, the initial redox potential is lowered close to -0.10 V vs. SHE, permitting wild-type extents of reduction by cells containing the Cbcl-dependent, low-potential pathway. Fresh akaganeite, especially at pH 6.3, behaves consistent with a redox potential of 0 V or greater, thus preventing reduction by cells containing only the low-potential pathway.

## Here Figure 2

These two experiments, using aging to reduce redox potential and pH to raise redox potential, caused changes in  $\Delta imcH$  phenotypes that provided evidence that *G. sulfurreducens* discriminates between extracellular electron acceptors independent of the mineral properties accessed by powder XRD. They also pointed to best practices for medium preparation in order to obtain consistent results if the question involves the *initial* redox conditions created by a mineral, and the proteins needed for electron transfer under those *initial* conditions. The amount of Fe(II) accumulated after 7 days provided a repeatable readout of the ability of a *G. sulfurreducens* strain or mutant reduce a given Fe(III)-

(oxyhydr)oxide. According to this assay, the more Fe(II) produced in 7 days by an  $\Delta imcH$  mutant, the lower the initial redox potential of the mineral.

### **Other mineral forms consistent with a multiple-pathway model**

A variety of Fe(III)-(oxyhydr)oxide minerals were then synthesized to test interactions of these variables. When schwertmannite was synthesized using a rapid precipitation method (Regenspurg et al., 2004), the mineral was stable at pH values below pH 4.0 and its structure could be confirmed by XRD. However, abiotic transformation of schwertmannite to other mineral forms is accelerated at pH values greater than 4.5 (Blodau & Knorr, 2006) and analysis of XRD patterns after schwertmannite was added to *Geobacter* growth medium revealed rapid formation of XRD-amorphous minerals (Figure 3E). Reduction phenotypes suggested this fresh mineral also produced a redox potential near 0 V vs. SHE, as cells lacking the high potential pathway ( $\Delta imcH$ ) showed a lag at pH 6.8, which was shorter after the mineral was autoclaved (Figure 3B). Reduction by  $\Delta imcH$  was worst when the redox potential was further raised by buffering to pH 6.3 (Figure 3C), while autoclaving pH 6.3 medium allowed a small amount of Fe(II) accumulation that ended the lag after >8 days.

### **Here Figure 3**

When Fe(III)-(oxyhydr)oxide was prepared according to the 2-line ferrihydrite protocol of Schwertmann and Cornell (2000), patterns were again similar to those observed with akaganite and schwertmannite. Freshly prepared mineral was reduced by  $\Delta cbcl$  to within 67% of wild type after seven days. When this mineral was freeze dried (resulting in XRD-confirmed 2-line ferrihydrite), reduction by  $\Delta cbcl$  was less than 30% of wild type, suggesting that freeze drying lowered redox potential of the mineral to a point where the low-potential pathway, encoded by *cbcl*, was more important. Changing pH by 0.5 units was not sufficient to alter reduction phenotypes, consistent with the freeze drying process lowering redox potential of ferrihydrite much more than 30 mV of pH change could overcome.

A general trend emerged during these experiments, consistent with autoclaving, freeze drying, and pH influencing redox potential in similar ways, regardless of the mineral. When reduction by  $\Delta imcH$  was near wild-type levels, reduction by  $\Delta cbcl$  was typically at its lowest. When reduction by  $\Delta cbcl$  was near wild-type levels,  $\Delta imcH$  cultures failed to reduce the provided electron acceptor. Figure 4 represents all seven-day reduction data from 17 different XRD-characterized mineral forms incubated with three different strains, ranked according to  $\Delta imcH$  performance. This trend suggests the two mutants act as an *in vivo* sensor of initial redox potential, across a suite of minerals and conditions.

For example, if initial conditions were well above 0 V vs. SHE, such as with freshly precipitated minerals in medium at pH 6.3,  $\Delta imcH$  mutants lacking the high potential pathway were unable to respire. When exposed to the same minerals,  $\Delta cbcl$  mutants containing only the high potential pathway performed similar to wild type. As minerals were aged or manipulated to lower their initial redox potential, the CbcL-dependent pathway became increasingly important to achieve wild-type extents of reduction. These incubations highlighted the different contributions of ImcH and CbcL to the initial rate vs. final extent of Fe(III) reduction, respectively.

Interestingly, some level of metal reduction was always observed for  $\Delta cbcl$  mutants exposed to minerals predicted to be very low potential acceptors. This result is similar to previous studies where  $\Delta cbcl$  still demonstrated a slow but detectable rate of respiration on electrodes poised at low redox potentials (Zacharoff et al., 2016). This activity may reflect a yet-undiscovered pathway used under thermodynamically challenging conditions, where neither ImcH- nor CbcL-dependent pathways can function.

The results in Figure 4 represent a suite of minerals (2-line ferrihydrite, goethite, akaganeite, schwertmannite, and birnessite), in which additional variability is introduced through freeze-drying, autoclaving, and pH adjustments. These variables could alter mineral crystal structure, particle size,

degree of aggregation, surface area, and surface charge, and thus influence microbial attachment or behavior in unpredictable ways (Cutting, et al., 2009; Majzlan et al., 2004; Navrotsky et al., 2008; Roden, 2006). However, all of these manipulations change redox potential in predictable ways. Further, these phenotypes are caused by the deletion of genes encoding inner membrane proteins, far from the outer surface reduction step(s) where metal charge or structure should play an important role. Based on the overall pattern of responses, we propose that redox potential should be viewed as a master variable affecting the pathway of extracellular electron acceptor reduction used by *G. sulfurreducens*.

**Here Figure 4**

**Cells lacking the CbcL-dependent pathway have increased growth yield.**

A key question stemming from this work relates to the evolutionary forces selecting for multiple electron transfer pathways at the inner membrane. As  $\Delta imcH$  cells are often able to completely reduce a provided mineral after a small amount of Fe(II) accumulates, why not encode a single, CbcL-dependent electron transfer pathway and allow it operate at all potentials? One hypothesis is that *G. sulfurreducens* is able to take advantage of the different amounts of energy represented by different metal (oxyhydr)oxides.

To test this hypothesis, the cell yield of *G. sulfurreducens* strains in which one pathway was removed was measured. Because both  $\Delta imcH$  and  $\Delta cbcL$  can initially reduce akaganeite (albeit to different extents), direct comparisons were possible when a low inoculum of each strain was added to medium containing this mineral (autoclaved at pH 6.8, as in Figure 2B) and incubated. Samples were removed for measurement of Fe(II) and direct plate counts on solid minimal medium. In all experiments,  $\Delta cbcL$  generated more colony forming units per mol Fe(II) produced than either wild type *G. sulfurreducens* or  $\Delta imcH$ . For each mM of Fe(III) reduced,  $\Delta cbcL$  produced  $2.5 \pm 0.3 \times 10^6$  CFU, while wild type and  $\Delta imcH$  produced  $0.8 \pm 0.1$  and  $1.6 \pm 0.1 \times 10^6$  CFU, respectively (n=5 for each strain). These

results indicated that when electron flow was forced through the ImcH-dependent pathway (as in  $\Delta cbcl$ ), more cells were produced per Fe(III) reduced.

Cell attachment to mineral particles could confound plate counts in experiments with cells grown on solid particles. When wild type *G. sulfurreducens* CFU were measured over the course of akaganeite reduction, a decrease was seen for time points shortly after inoculation when Fe(II) begins to rapidly accumulate, which may suggest an association of cells to akaganeite particles or aggregation of cells to other cells. In a second series of experiments, basal medium containing acetate and fumarate was inoculated with a 2 % v/v inoculum from akaganeite-grown cultures. Because all wild-type and mutant cultures grow at similar rates with fumarate as the electron acceptor (see Table 1), the point at which optical density is detectable in fumarate grown cultures is a function of the number of cells in the initial inoculum. In all of these experiments,  $\Delta cbcl$  again demonstrated significantly more cells per mol Fe(II) than did wild type or  $\Delta imcH$ .

These fumarate outgrowth experiments, which reflect the total number of cells in the mineral containing medium at a given time point, agreed with the trend seen in direct plate counts from akaganeite cultures. In both cases,  $\Delta cbcl$  generated more cells per mol Fe(III) reduced than either wild type or  $\Delta imcH$ . When normalized to the amount of Fe(II) produced,  $\Delta cbcl$  yield was  $246.2\% \pm 15.11$  of that of wild-type, whereas  $\Delta imcH$  yield was  $105.2\% \pm 24.33$  ( $n=3$  in both cases). Combined with previous data showing that the ImcH-dependent pathways support faster growth rates when electrodes poised at +0.24 V vs. SHE (Zacharoff et al., 2016), this supports the hypothesis that *G. sulfurreducens* alters its electron transfer pathway to use a higher yield pathway whenever possible. Somehow, these inner membrane pathways are able to switch 'on' and 'off' in response to the redox potential of external electron acceptors. This difference provides one explanation for maintaining the complexity and burden associated with encoding multiple pathways of electron transfer across the inner membrane.



## Discussion:

Fe(III)-(oxyhydr)oxide minerals in nature exist as a complex continuum of potential energies. As such, it is unsurprising that bacteria would evolve equally complex mechanisms able to harness the energy available during respiration to these metals. While a single pathway essential for reduction of all metals emerged in the model metal-reducing *Shewanella spp.*, a similarly simple solution has remained elusive in *Geobacter spp.*. The data reported here demonstrates that even under the most common laboratory conditions where Fe(III)-(oxyhydr)oxide is precipitated and added to medium, *G. sulfurreducens* will utilize multiple electron transfer pathways to accomplish what is considered to be wild-type levels of Fe(III) reduction. For Fe(III)-(oxyhydr)oxides that are predicted to have redox potentials around 0 V, such as schwertmannite, akaganeite, and ferrihydrite, the electron-accepting potential decreases as Fe(II) accumulates, and triggers utilization of electron transfer pathways that support lower cell yield and slower growth rate, but still allow some respiration. The ability of *G. sulfurreducens* to respond to the changing redox potential of its environment likely allows this organism to make the most efficient use of the provided mineral.

Based on proteomic studies, *G. sulfurreducens* expresses at least 78 expressed multiheme c-type cytochromes, yet mutant analyses were initially unable to link particular cytochromes to reduction of specific extracellular electron acceptors (Aklujkar et al., 2013; Leang et al., 2003, 2010; Rollefson et al., 2009, 2011; Shi et al., 2007). One possible source of cytochrome diversity could be separate pathways required for soluble Fe(III)-citrate, insoluble Fe(III)-(oxyhydr)oxides, and Mn(IV)-(oxyhydr)oxides. However, despite their many differences, Fe(III)-citrate and Mn(IV)-(oxyhydr)oxides both represent high potential acceptors, from the viewpoint of the inner membrane. As we detect evidence for at least one other pathway in this work, and the *G. sulfurreducens* genome appears to encode at least 4 other inner membrane quinone oxidoreductases, redox potential differences may help to explain additional cytochrome complexity of *Geobacter*. Possessing protein machinery able extract the full advantage from

minerals as they descend through the redox tower also helps explain the dominance of these metal-reducing organisms in contaminated subsurface environments undergoing rapid redox potential changes.

In order to characterize and biochemically dissect extracellular electron transfer in dissimilatory metal reducing organisms such as *G. sulfurreducens*, closer attention may need to be paid not just to crystal structure, but the actual redox potential experienced by the organisms interacting with these minerals. Commonly synthesized Fe-(oxyhydr)oxides prepared by precipitation of Fe(III) can produce very different rates of reduction or mutant phenotypes depending on the age of the material and the length of time one is willing to incubate cells. A distinction between initial rates of Fe(III)-(oxyhydr)oxide reduction, where higher-potential conditions exist, and final extent of reduction achieved by lower potential pathways may help separate some of these confounding effects. One would also expect significant differences in washed cell suspensions, where the degree of respiratory coupling to growth is not part of the assay, since electron flow through the ImcH- and CbcL-dependent pathways support different growth rates and yields.

It now appears that in *G. sulfurreducens* a transition from an ImcH-dependent electron transfer pathway to a CbcL-dependent pathway occurs both when electrodes and many commonly used Fe(III)-(oxyhydr)oxides are provided as sole terminal electron acceptors. The initial rate and total extent of Fe(III)-(oxyhydr)oxide reduction may also be the result of a series of redox potential dependent processes in environmental samples, with each step supporting different cell yields. Competition in the environment could occur along any part of this continuum, rewarding those capable of rapid growth when the Fe(III)-(oxyhydr)oxide is high potential, or those able to survive with electron acceptors at relatively low redox potentials. The prevalence of ImcH and CbcL homologues in other dissimilatory metal reducing organisms and in metagenomics data from sites undergoing active metal reduction

409 (Levar et al., 2014; Zacharoff et al., 2016) suggests that this type of redox discrimination may also occur  
410 in diverse organisms, and provides interesting opportunities for further exploration of redox potential  
411 dependent respiration in these organisms and environments.

412

# References:

- Aklujkar, M. A., Coppi, M. V, Leang, C., Kim, B. C., Chavan, M. A., Perpetua, L. A., ... Holmes, D. E. (2013). Proteins involved in electron transfer to Fe(III) and Mn(IV) oxides by *Geobacter sulfurreducens* and *Geobacter uraniireducens*. *Microbiology*, 159, 515–535.
- Blodau, C., & Knorr, K. H. (2006). Experimental inflow of groundwater induces a “biogeochemical regime shift” in iron-rich and acidic sediments. *Journal of Geophysical Research: Biogeosciences*, 111, 1–12.
- Bonneville, S., Van Cappellen, P., & Behrends, T. (2004). Microbial reduction of iron(III) oxyhydroxides: Effects of mineral solubility and availability. *Chemical Geology*, 212, 255–268.
- Caccavo, F., Lonergan, D. J., Lovley, D. R., Davis, M., Stolz, J. F., & McInerney, M. J. (1994). *Geobacter sulfurreducens* sp. nov., a hydrogen- and acetate-oxidizing dissimilatory metal-reducing microorganism. *Applied and Environmental Microbiology*, 60, 3752–3759.
- Chan, C. H., Levar, C. E., Zacharoff, L., Badalamenti, J. P., & Bond, D. R. (2015). Scarless genome editing and stable inducible expression vectors for *Geobacter sulfurreducens*. *Applied and Environmental Microbiology*, 81, 7178–7186.
- Cutting, R. S., Coker, V. S., Fellowes, J. W., Lloyd, J. R., & Vaughan, D. J. (2009). Mineralogical and morphological constraints on the reduction of Fe(III) minerals by *Geobacter sulfurreducens*. *Geochimica et Cosmochimica Acta*, 73, 4004–4022.
- Green, J., & Paget, M. S. (2004). Bacterial redox sensors. *Nature Reviews Microbiology*, 2, 954–966.
- Hansel, C. M., Lentini, C. J., Tang, Y., Johnston, D. T., Wankel, S. D., & Jardine, P. M. (2015). Dominance of sulfur-fueled iron oxide reduction in low-sulfate freshwater sediments. *The ISME Journal*, 9, 2400–2412.
- Kostka, J. E., & Nealson, K. H. (1995). Dissolution and reduction of magnetite by bacteria. *Environmental Science & Technology*, 29, 2535–2540.
- Leang, C., Coppi, M. V, & Lovley, D. R. (2003). OmcB, a c-type polyheme cytochrome, involved in Fe(III) reduction in *Geobacter sulfurreducens*. *Journal of Bacteriology*, 185, 2096–2103.
- Leang, C., Qian, X., Mester, T., & Lovley, D. R. (2010). Alignment of the c-type cytochrome OmcS along pili of *Geobacter sulfurreducens*. *Applied and Environmental Microbiology*, 76, 4080–4084.
- Levar, C. E., Chan, C. H., Mehta-Kolte, M. G., & Bond, D. R. (2014). An inner membrane cytochrome required only for reduction of high redox potential extracellular electron acceptors. *MBio*, 5, e02034.
- Lovley, D. R., & Phillips, E. J. (1986). Organic matter mineralization with reduction of ferric iron in anaerobic sediments. *Applied and Environmental Microbiology*, 51, 683–689.

- 446 Lovley, D. R., & Phillips, E. J. (1987). Rapid assay for microbially reducible ferric iron in aquatic sediments.  
447 *Applied and Environmental Microbiology*, 53, 1536–1540.
- 448 Majzlan, J. (2011). Thermodynamic stabilization of hydrous ferric oxide by adsorption of phosphate and  
449 arsenate. *Environmental Science & Technology*, 45, 4726–4732.
- 450 Majzlan, J. (2012). Minerals and Aqueous Species of Iron and Manganese as Reactants and Products of  
451 Microbial Metal Respiration. In J. Gescher & A. Kappler (Eds.), *Microbial Metal Respiration; From*  
452 *Geochemistry to Potential Applications* (1st ed., pp. 1–28). Springer.
- 453 Majzlan, J., Navrotsky, A., & Schwertmann, U. (2004). Thermodynamics of iron oxides: Part III. Enthalpies  
454 of formation and stability of ferrihydrite ( $\sim\text{Fe}(\text{OH})_3$ ), schwertmannite ( $\sim\text{FeO}(\text{OH})_{3/4}(\text{SO}_4)_{1/8}$ ), and  $\epsilon$ -  
455  $\text{Fe}_2\text{O}_3$ . *Geochimica et Cosmochimica Acta*, 68, 1049–1059.
- 456 Marsili, E., Rollefson, J. B., Baron, D. B., Hozalski, R. M., & Bond, D. R. (2008). Microbial biofilm  
457 voltammetry: direct electrochemical characterization of catalytic electrode-attached biofilms.  
458 *Applied and Environmental Microbiology*, 74, 7329–7337.
- 459 Michel, F. M., Ehm, L., Antao, S. M., Lee, P. L., Chupas, P. J., Liu, G., ... Parise, J. B. (2007). The structure of  
460 ferrihydrite, a nanocrystalline material. *Science*, 316, 1726–1729.
- 461 Navrotsky, A., Mazeina, L., & Majzlan, J. (2008). Size-driven structural and thermodynamic complexity in  
462 iron oxides. *Science*, 319, 1635–1638.
- 463 Nealson, K. H., & Myers, C. R. (1992). Microbial reduction of manganese and iron: New approaches to  
464 carbon cycling. *Applied and Environmental Microbiology*, 58, 439–443.
- 465 Nealson, K. H., & Saffarini, D. (1994). Iron and manganese in anaerobic respiration: environmental  
466 significance, physiology, and regulation. *Annual Review of Microbiology*, 48, 311–343.
- 467 Orsetti, S., Laskov, C., & Haderlein, S. B. (2013). Electron transfer between iron minerals and quinones:  
468 estimating the reduction potential of the Fe(II)-goethite surface from AQDS speciation.  
469 *Environmental Science & Technology*, 47, 14161–14168.
- 470 Post, J. E., & Veblen, D. R. (1990). Crystal structure determinations of synthetic sodium, magnesium, and  
471 potassium birnessite using TEM and the Rietveld method. *American Mineralogist*, 75, 477–489.
- 472 Raven, K. P., Jain, A., & Loeppert, R. H. (1998). Arsenite and arsenate adsorption on ferrihydrite: Kinetics,  
473 equilibrium, and adsorption envelopes. *Environmental Science and Technology*, 32, 344–349.
- 474 Regenspurg, S., Brand, A., & Peiffer, S. (2004). Formation and stability of schwertmannite in acidic  
475 mining lakes. *Geochimica et Cosmochimica Acta*, 68, 1185–1197.
- 476 Roden, E. E. (2006). Geochemical and microbiological controls on dissimilatory iron reduction. *Comptes*  
477 *Rendus Geoscience*, 338(1), 456–467.

478 Roden, E. E., Urrutia, M. M., & Mann, C. J. (2000). Bacterial reductive dissolution of crystalline Fe (III)  
479 oxide in continuous-flow column reactors. *Applied and Environmental Microbiology*, 66, 1062–  
480 1065.

481 Roden, E. E., & Zachara, J. M. (1996). Microbial reduction of crystalline iron(III) oxides: Influence of oxide  
482 surface area and potential for cell growth. *Environmental Science & Technology*, 30, 1618–1628.

483 Rollefson, J. B., Levar, C. E., & Bond, D. R. (2009). Identification of genes involved in biofilm formation  
484 and respiration via mini-*Himar* transposon mutagenesis of *Geobacter sulfurreducens*. *Journal of*  
485 *Bacteriology*, 191, 4207–4217.

486 Rollefson, J. B., Stephen, C. S., Tien, M., & Bond, D. R. (2011). Identification of an extracellular  
487 polysaccharide network essential for cytochrome anchoring and biofilm formation in *Geobacter*  
488 *sulfurreducens*. *Journal of Bacteriology*, 193, 1023–1033.

489 Russell, J. B., & Cook, G. M. (1995). Energetics of bacterial growth: balance of anabolic and catabolic  
490 reactions. *Microbiological Reviews*, 59(1), 48–62.

491 Sander, M., Hofstetter, T. B., & Gorski, C. A. (2015). Electrochemical analyses of redox-active iron  
492 minerals: A review of non-mediated and mediated approaches. *Environmental Science &*  
493 *Technology*, 49, 5862–5878.

494 Schwertmann, U., & Cornell, R. M. (2000). *Iron Oxides in the Laboratory: Preparation and*  
495 *Characterization* (2nd ed.). Wiley-VCH.

496 Shi, L., Squier, T. C., Zachara, J. M., & Fredrickson, J. K. (2007). Respiration of metal (hydr)oxides by  
497 *Shewanella* and *Geobacter*: a key role for multihaem c-type cytochromes. *Molecular Microbiology*,  
498 65, 12–20.

499 Thamdrup, B. (2000). Bacterial manganese and iron reduction in aquatic sediments. In B. Schink (Ed.),  
500 *Advances in Microbial Ecology* (16th ed., pp. 41–84). Springer.

501 Thauer, R. K., Jungermann, K., Decker, K., & Pi, P. P. H. (1977). Energy conservation in chemotrophic  
502 anaerobic bacteria. *Bacteriological Reviews*, 41, 100–180.

503 Yoho, R. A., Popat, S. C., & Torres, C. I. (2014). Dynamic potential-dependent electron transport pathway  
504 shifts in anode biofilms of *Geobacter sulfurreducens*. *ChemSusChem*, 7, 3413–3419.

505 Zacharoff, L., Chan, C. H., & Bond, D. R. (2016). Reduction of low potential electron acceptors requires  
506 the CbcL inner membrane cytochrome of *Geobacter sulfurreducens*. *Bioelectrochemistry*, 107, 7–13.

**Table 1**

bioRxiv preprint doi: <https://doi.org/10.1101/043059>; this version posted April 5, 2016. The copyright holder for this preprint (which was not certified by peer review) is the author/funder. All rights reserved. No reuse allowed without permission.

| Strain                          | Source                   | Doubling time in minimal medium<br>at different pH (hours)* |         |
|---------------------------------|--------------------------|-------------------------------------------------------------|---------|
|                                 |                          | 6.3                                                         | 6.8     |
| <i>Geobacter sulfurreducens</i> |                          |                                                             |         |
| Wild type (ATCC 51573)          | Caccavo et al., 1994     | 6.5±0.2                                                     | 5.6±0.2 |
| <i>Δcbcl</i>                    | Zacharoff et al., 2016   | 5.6±0.2                                                     | 6.4±0.1 |
| <i>ΔimcH</i>                    | Chi Ho Chan et al., 2015 | 5.7±0.1                                                     | 6.0±0.2 |

\* Doubling times are the mean and standard deviation of at least two independent experiments of triplicate cultures

# Figure 1

bioRxiv preprint doi: <https://doi.org/10.1101/043059>; this version posted April 5, 2016. The copyright holder for this preprint (which was not certified by peer review) is the author/funder. All rights reserved. No reuse allowed without permission.

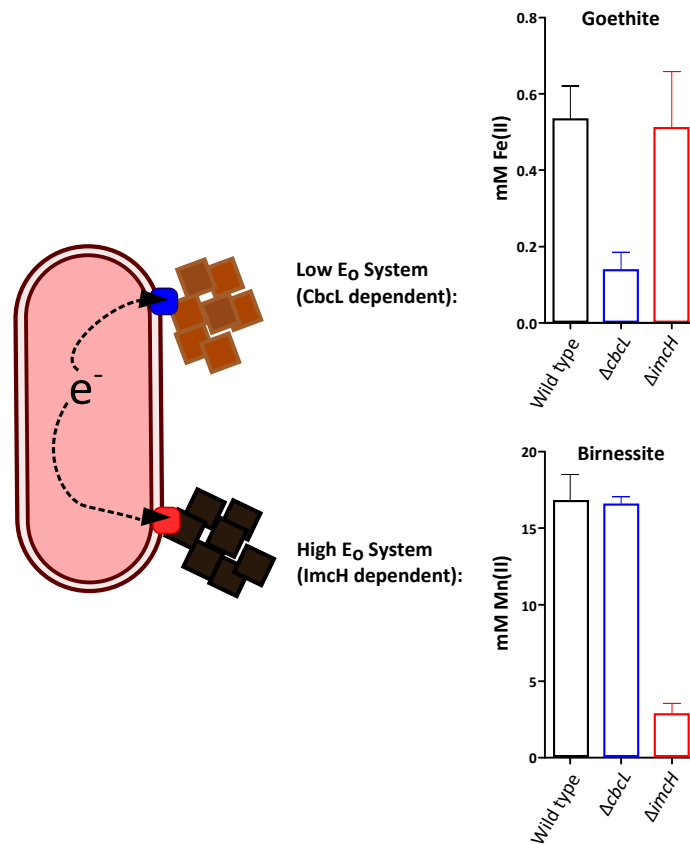

***G. sulfurreducens* requires at least two distinct electron transfer pathways for the reduction of minerals:** Wild type *G. sulfurreducens* has the ability to reduce extracellular electron acceptors ranging from the low potential Fe(III)-(oxyhydr)oxide goethite ( $\alpha$ -FeOOH) to the high potential Mn(IV)-oxide birnessite ( $\text{Na}_x\text{Mn}_{2-x}(\text{IV})\text{Mn}(\text{III})_x\text{O}_4$ ,  $x \sim 0.4$ ). Mutants deficient in CbcL or ImcH show reduction phenotypes consistent with redox potential discrimination.  $\Delta cbcL$  reduces birnessite as well as wild type, but fails to reduce goethite after 14 days of incubation.  $\Delta imcH$  reduces goethite as well as wild type, but is unable to reduce birnessite. Data shown are the mean and standard deviation of triplicate cultures.



## Figure 2

bioRxiv preprint doi: <https://doi.org/10.1101/043059>; this version posted April 5, 2016. The copyright holder for this preprint (which was not certified by peer review) is the author/funder. All rights reserved. No reuse allowed without permission.

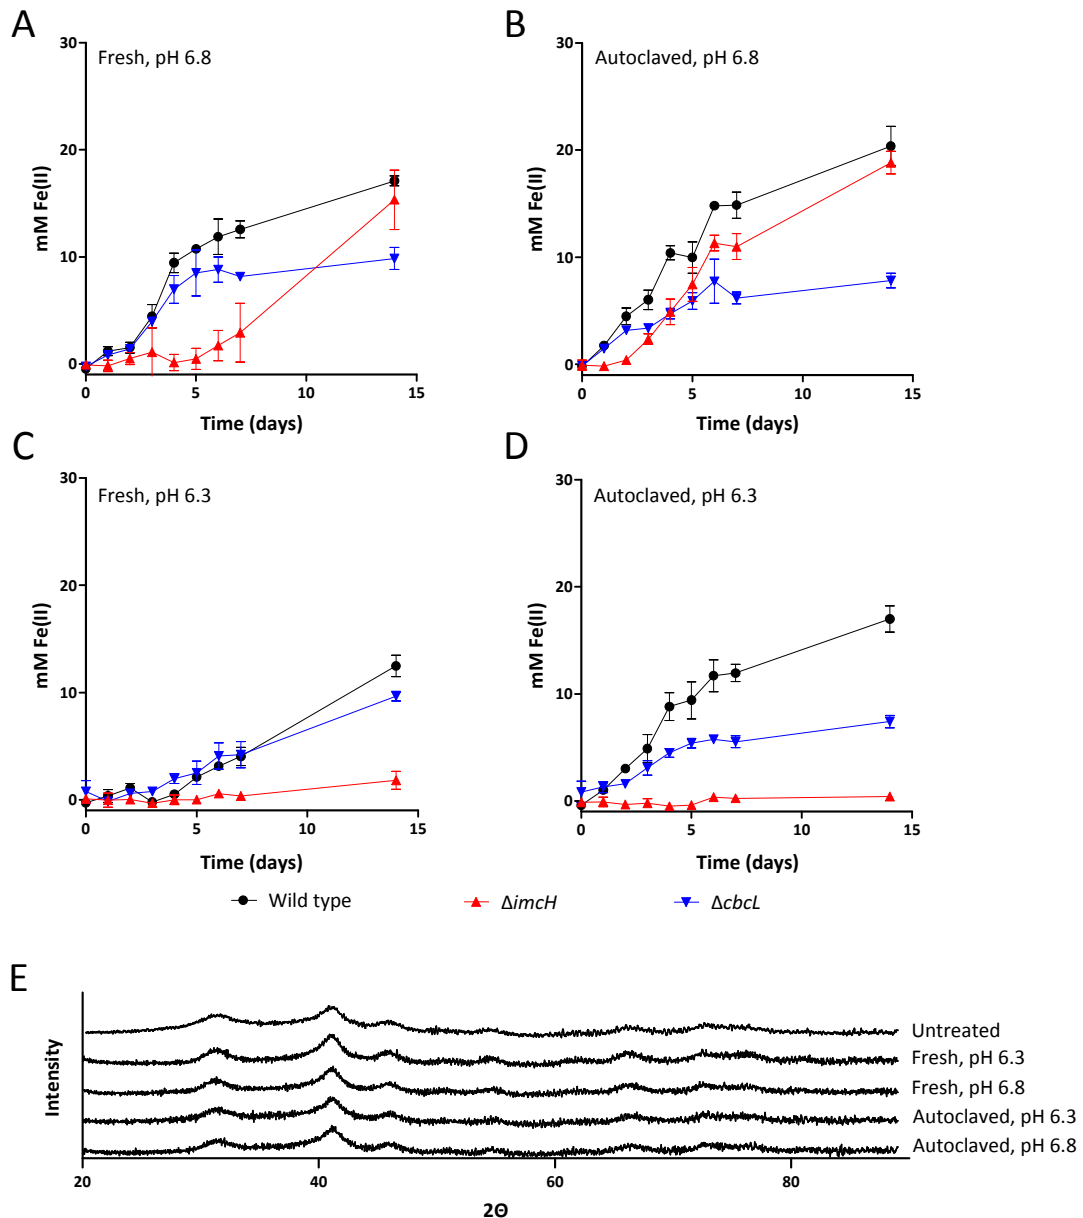

**Autoclaving and changing pH alters mutant phenotypes.** In all cases, wild type is represented by black circles,  $\Delta cbcl$  by downward pointing blue triangles, and  $\Delta imcH$  by upward pointing red triangles. (A) A long lag is observed for  $\Delta imcH$  inoculated into medium with no autoclaving. (B) The lag observed for  $\Delta imcH$  is decreased when the medium is aged through autoclaving. (C) Decreasing the pH by 0.5 units eliminates akaganeite reduction by  $\Delta imcH$ . (D) Aging pH 6.3 medium through autoclaving is not sufficient to decrease the redox potential enough to allow for reduction by  $\Delta imcH$ . All data shown are the mean and standard deviation for triplicate cultures, and are representative of at least duplicate incubations. (E) XRD patterns of the mineral used in panels A-D. The XRD pattern for the freshly precipitated mineral is also shown. No changes in XRD patterns were observed between multiple batches of synthesis and media preparation, suggesting that differences in  $\Delta imcH$  behavior are due to changes in the initial redox potential of the medium.

# Figure 3

bioRxiv preprint doi: <https://doi.org/10.1101/043059>; this version posted April 5, 2016. The copyright holder for this preprint (which was not certified by peer review) is the author/funder. All rights reserved. No reuse allowed without permission.

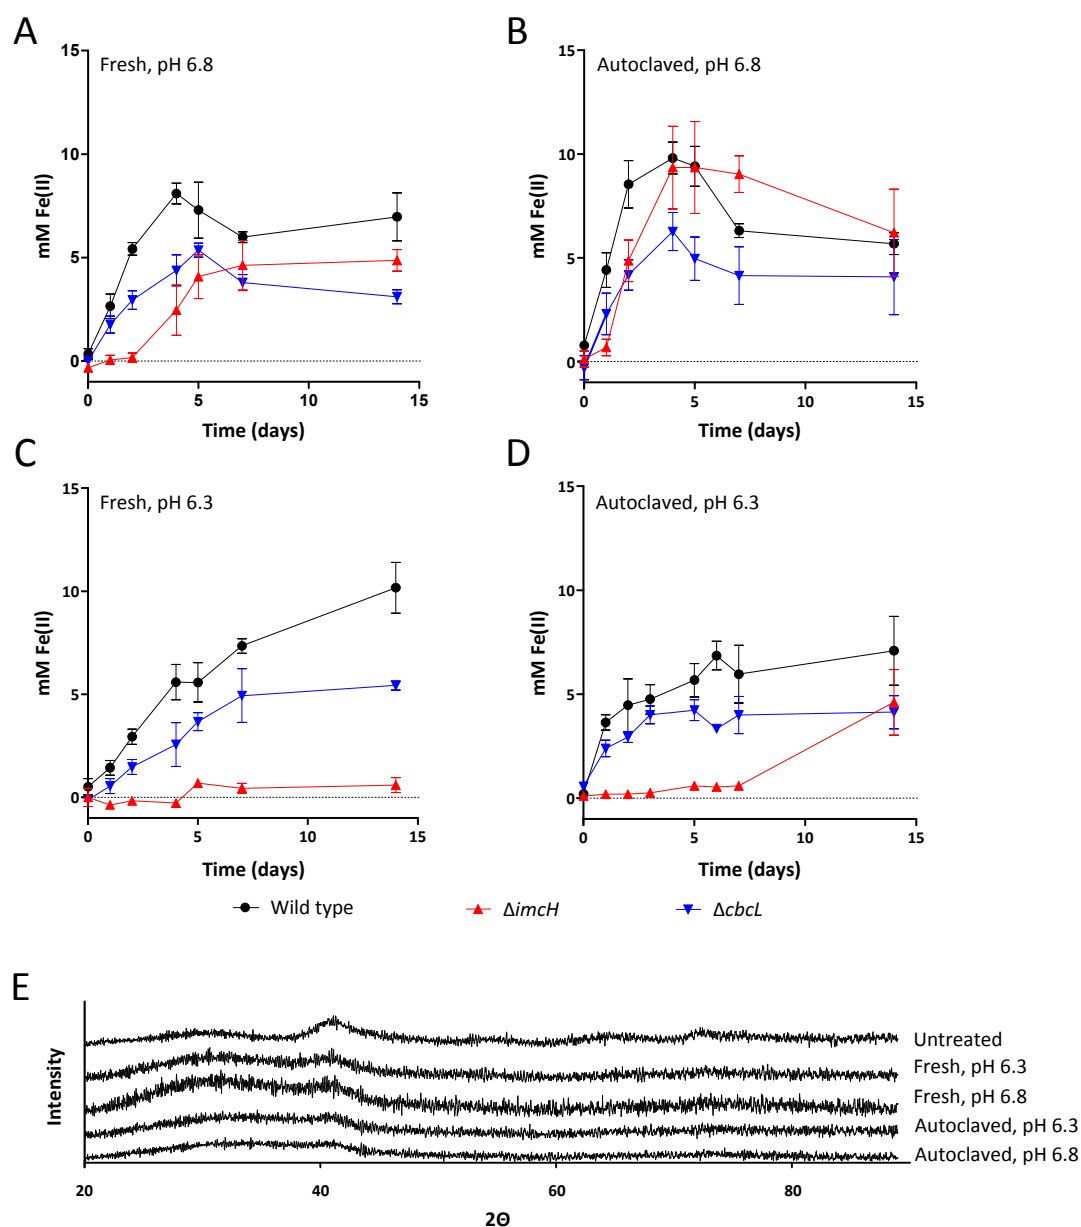

**Treatment of schwertmannite with growth medium at pH 6.3 or pH 6.8 alters mineralogy:** Rapid precipitation of an Fe sulfide solution with hydrogen peroxide yields XRD-pure schwertmannite ("untreated", Panel E), but when this mineral suspension is added to growth medium and adjusted to circumneutral pH values, abiotic transformation to other mineral forms is observed. Autoclaving these media lead to further mineral transformation.

**Figure 4**

bioRxiv preprint doi: <https://doi.org/10.1101/043059>; this version posted April 5, 2016. The copyright holder for this preprint (which was not certified by peer review) is the author/funder. All rights reserved. No reuse allowed without permission.

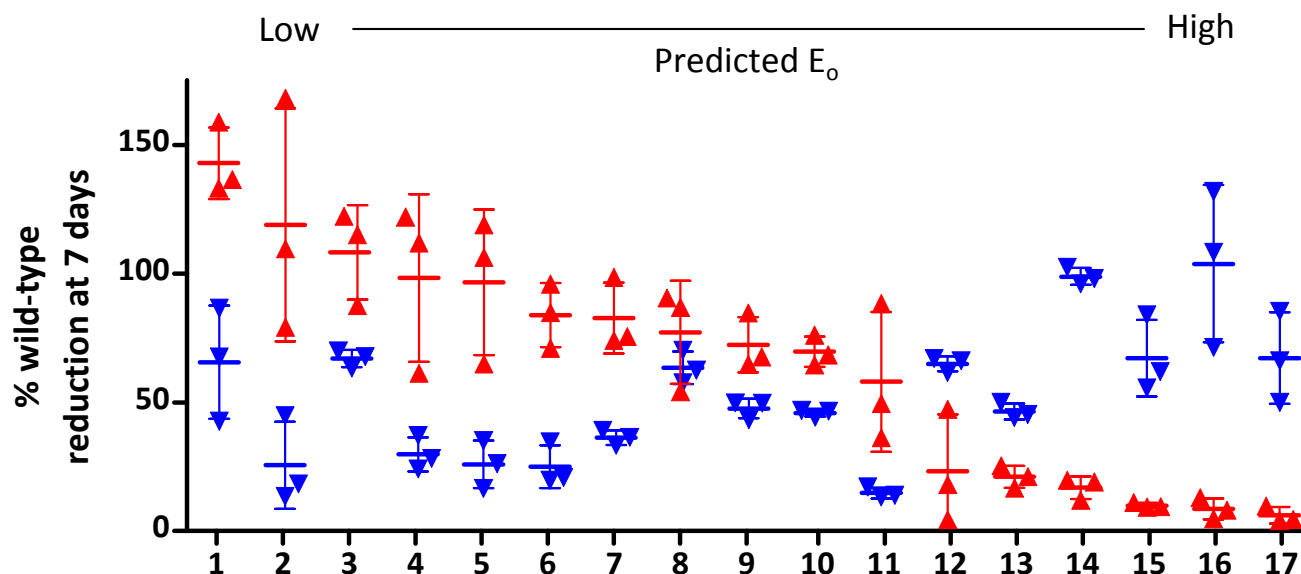

| #  | Starting mineral* | Freeze dried (Y/N) | Autoclaved (Y/N) | pH  | Resulting mineral† |
|----|-------------------|--------------------|------------------|-----|--------------------|
| 1  | Schwertmannite    | N                  | Y                | 6.8 | XRD Amorphous      |
| 2  | 2-line Fh         | Y                  | N                | 6.3 | 2-line Fh          |
| 3  | 2-line Fh         | N                  | N                | 6.8 | Akaganeite         |
| 4  | Goethite          | Y                  | N                | 6.8 | Goethite           |
| 5  | 2-line Fh         | Y                  | N                | 6.8 | 2-line Fh          |
| 6  | 2-line Fh         | Y                  | Y                | 6.3 | 2-line Fh          |
| 7  | Akaganeite        | N                  | Y                | 6.8 | Akaganeite         |
| 8  | Schwertmannite    | N                  | N                | 6.8 | XRD Amorphous      |
| 9  | Akaganeite        | N                  | Y                | 6.6 | Akaganeite         |
| 10 | Akaganeite        | N                  | Y                | 6.5 | Akaganeite         |
| 11 | 2-line Fh         | Y                  | Y                | 6.8 | 2-line Fh          |
| 12 | Akaganeite        | N                  | N                | 6.8 | Akaganeite         |
| 13 | Akaganeite        | N                  | Y                | 6.3 | Akaganeite         |
| 14 | Birnessite        | N                  | N                | 6.8 | Birnessite         |
| 15 | Schwertmannite    | N                  | Y                | 6.3 | XRD Amorphous      |
| 16 | Akaganeite        | N                  | N                | 6.3 | Akaganeite         |
| 17 | Schwertmannite    | N                  | N                | 6.3 | XRD Amorphous      |

\*Listed mineral is mineral identity prior to treatment with media or autoclaving.

†Listed mineral is mineral identity after treatment with media or autoclaving and before inoculation with *G. sulfurreducens*

***G. sulfurreducens* requires both *ImcH* and *CbcL* for complete reduction of a range of minerals:** Cultures of  $\Delta imcH$  (red upward pointing triangles) and  $\Delta cbcl$  (blue downward pointing triangles) were incubated with minerals as the sole terminal electron acceptor, and the extent of Fe(II) or Mn(II) accumulation after seven days of incubation were measured relative to that of wild type *G. sulfurreducens*. Conditions are ordered left to right in order of  $\Delta imcH$  reduction, from best to worst. Akaganeite,  $\beta$ -FeOOH. Schwertmannite,  $Fe_8O_8(OH)_6(SO_4)_n \cdot nH_2O$ . 2-line Fh (Ferrihydrite), ca.  $Fe_{10}O_{14}(OH)_2$ . Birnessite  $Na_xMn_{2-x}(IV)Mn(III)_xO_4$ ,  $x \sim 0.4$ , Goethite,  $\alpha$ -FeOOH.
